# Supplementary material for: Two new series of rare-earth organic frameworks involving two structural architectures: syntheses, structures and magnetic properties
Source: Royal Society of Chemistry journal article supplement (doi:10.1039/c3ce26766k), 2013-01-01
Supplement: c3ce26766k.pdf [file c3ce26766k.pdf]

# Supporting Information

**Two new series of rare-earth organic frameworks involving two structural architectures: syntheses, structures and magnetic properties**

Zih-Rong Jhu,<sup>a</sup> Chen-I Yang<sup>\*a</sup> and Gene-Hsiang Lee<sup>b</sup>

<sup>a</sup> Department of Chemistry, Tunghai University, Taichung 407, Taiwan

<sup>b</sup> Instrumentation Center, College of Science, National Taiwan University, Taipei, 106 Taiwan

(a)

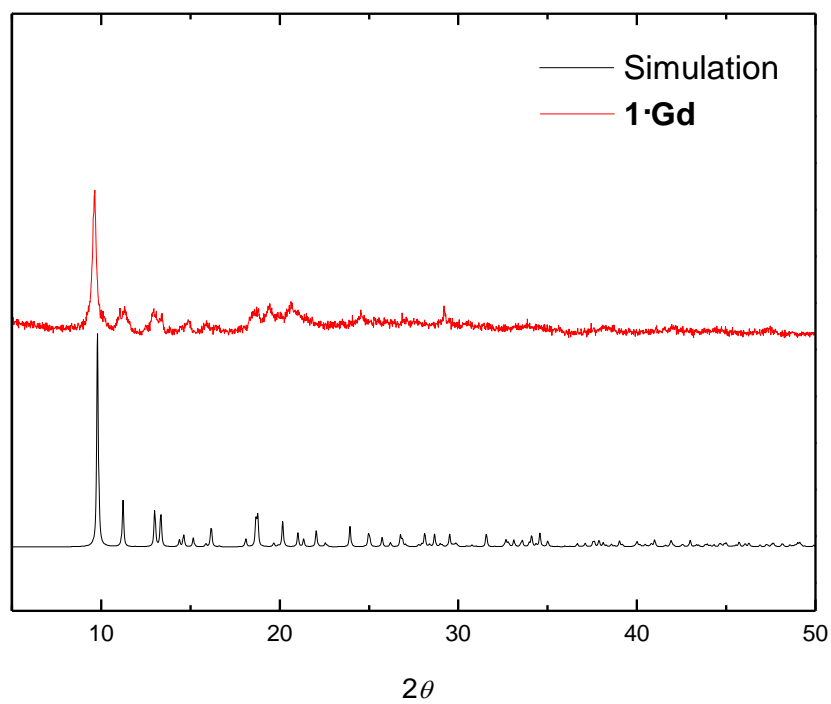

(b)

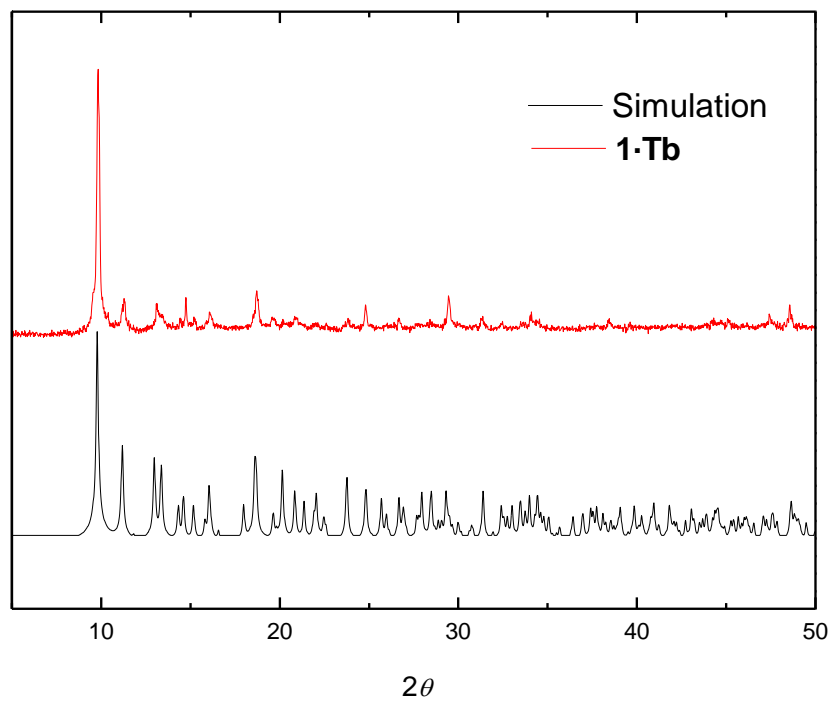

(c)

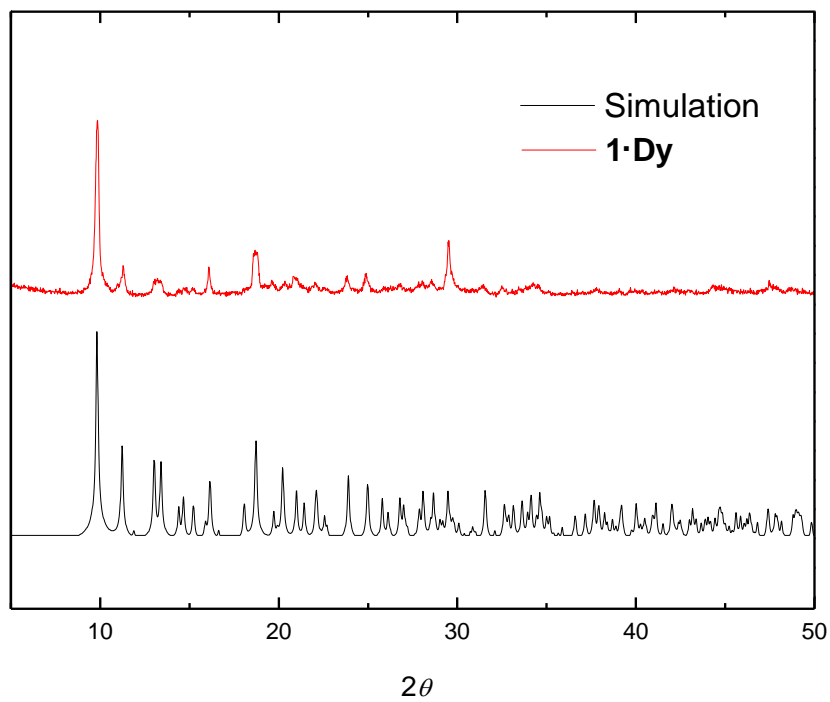

(d)

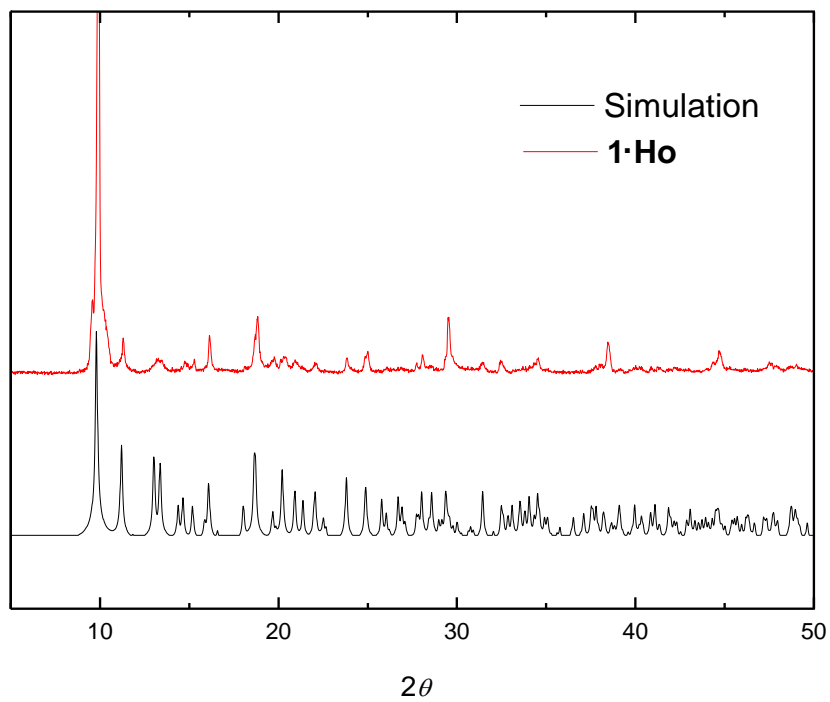

(e)

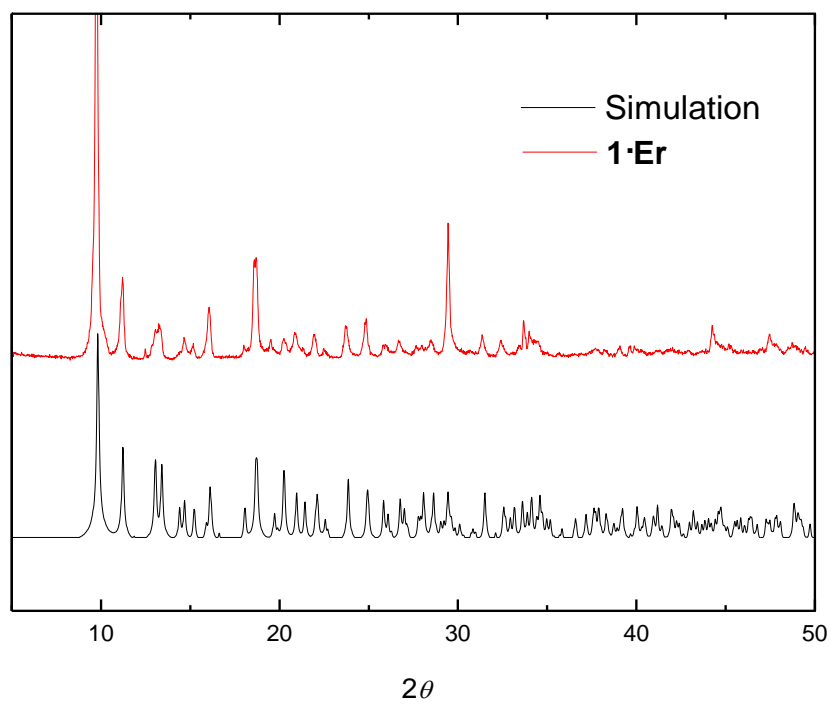

**Fig. S1.** Simulated PXRD pattern (red) and experimental PXRD pattern of **1·Gd–1·Er**.

(a)

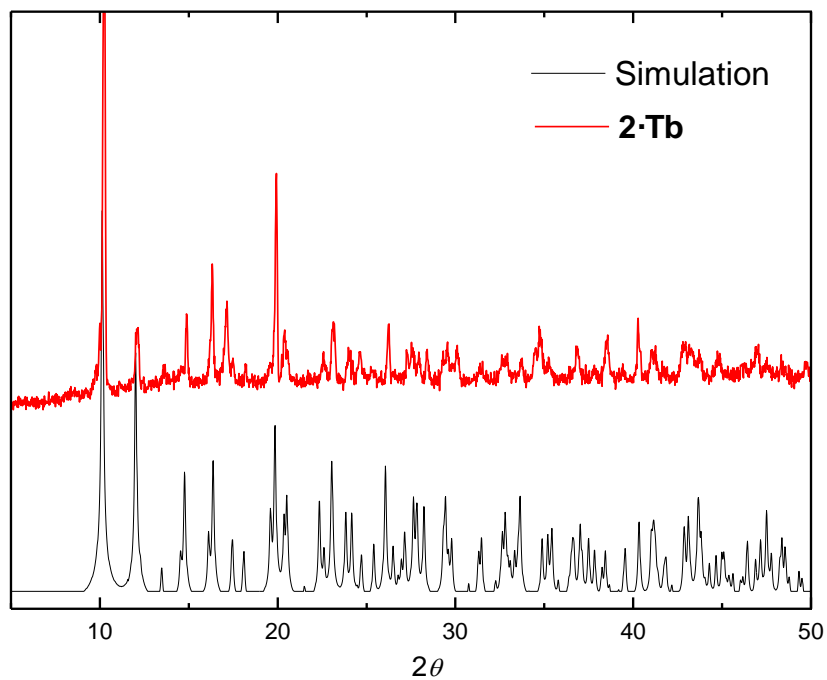

(b)

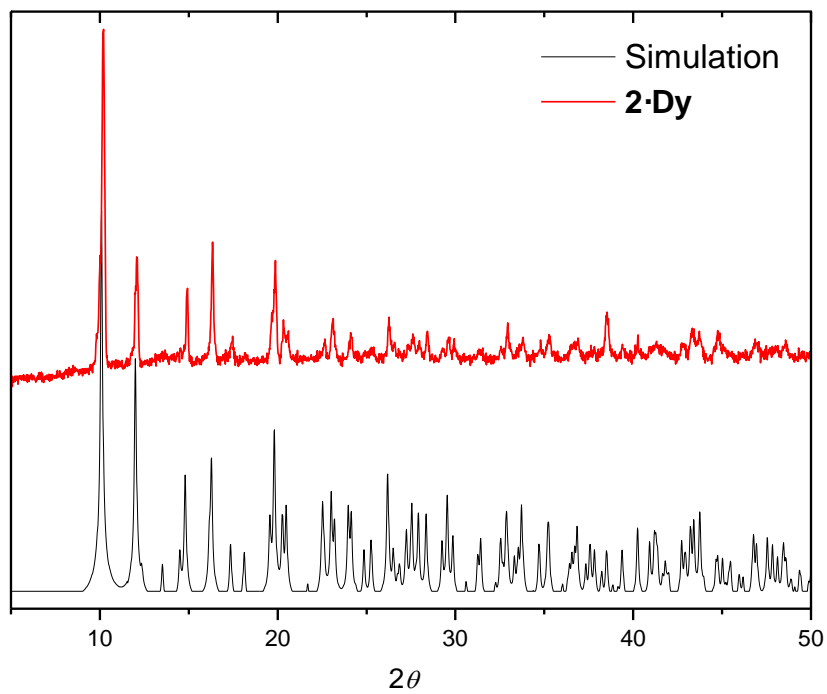

(c)

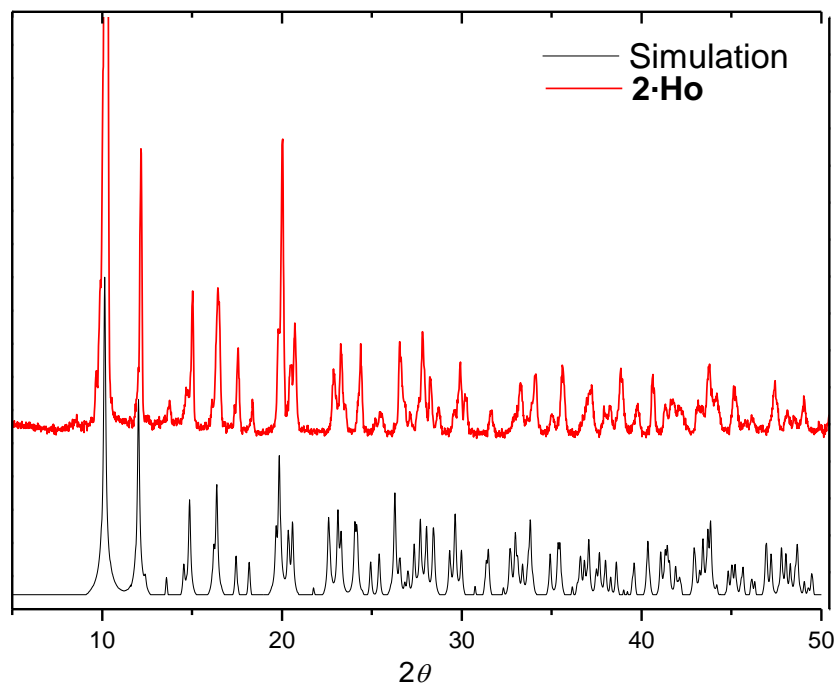

(d)

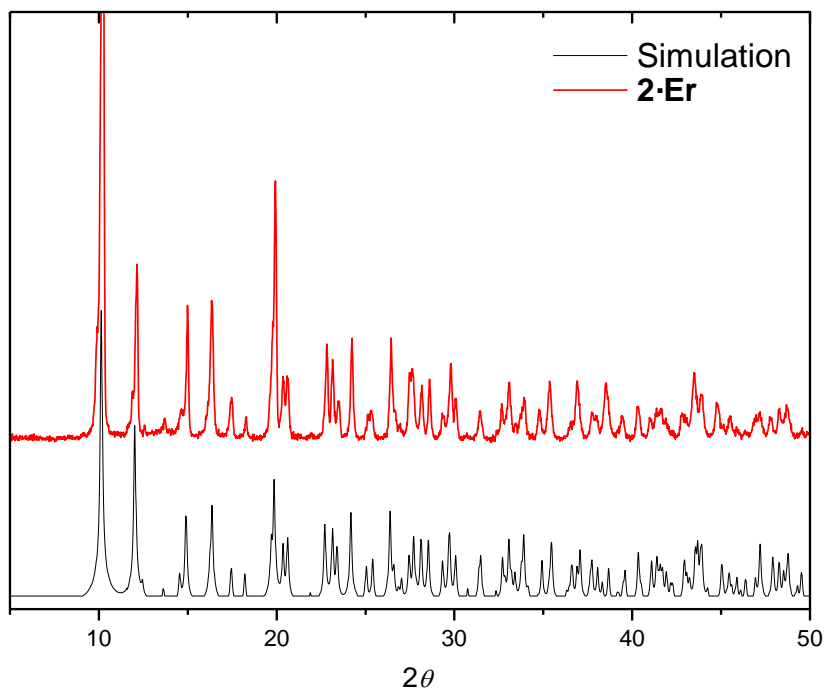

**Fig. S2.** Simulated PXRD pattern (red) and experimental PXRD pattern of  $2 \cdot \text{Tb}-2 \cdot \text{Er}$ .

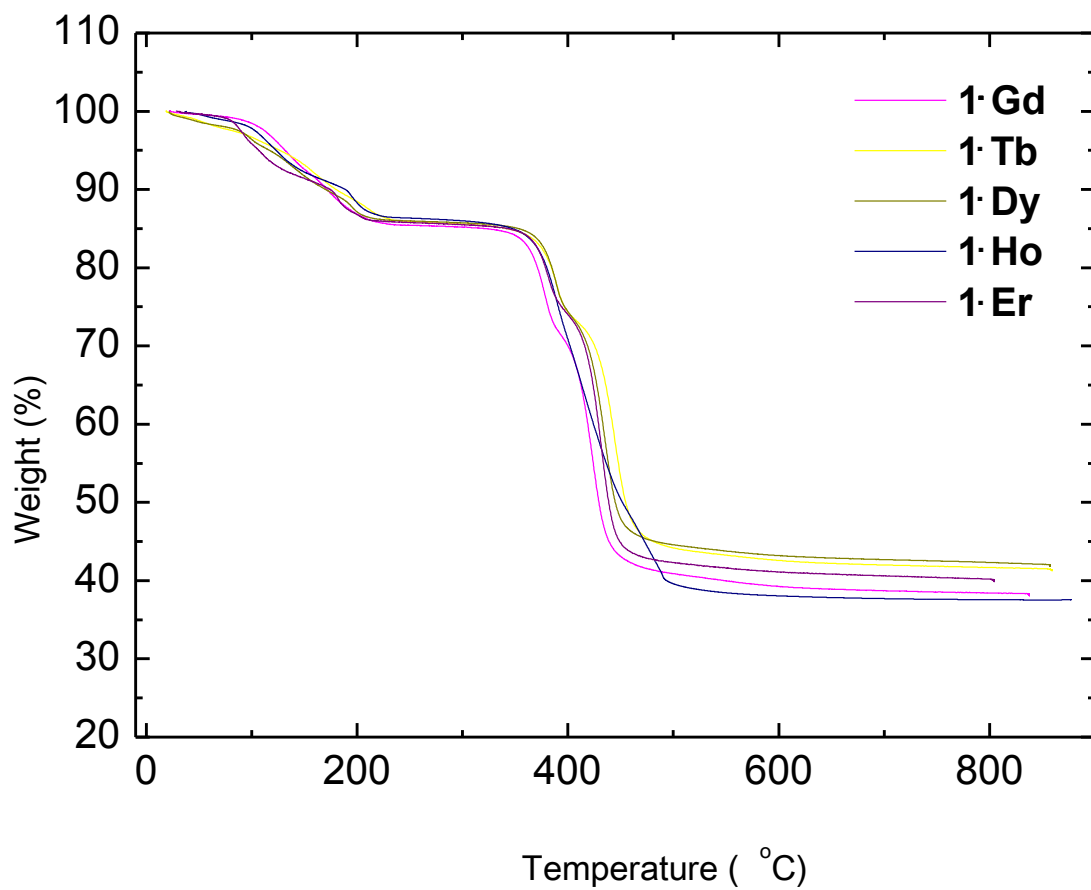

**Fig. S3.** Thermogravimetric (TG) analysis diagrams of 1·Gd–1·Er.

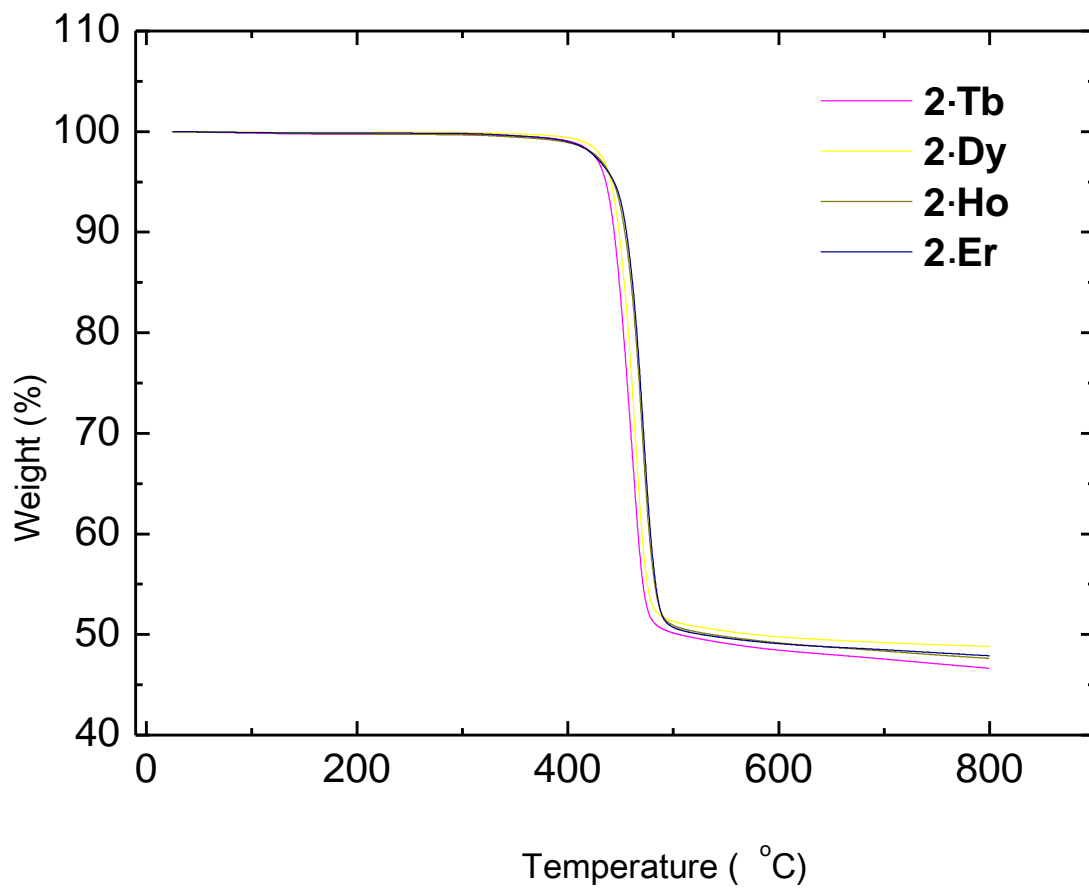

**Fig. S4.** Thermogravimetric (TG) analysis diagrams of **2·Tb–2·Er**.



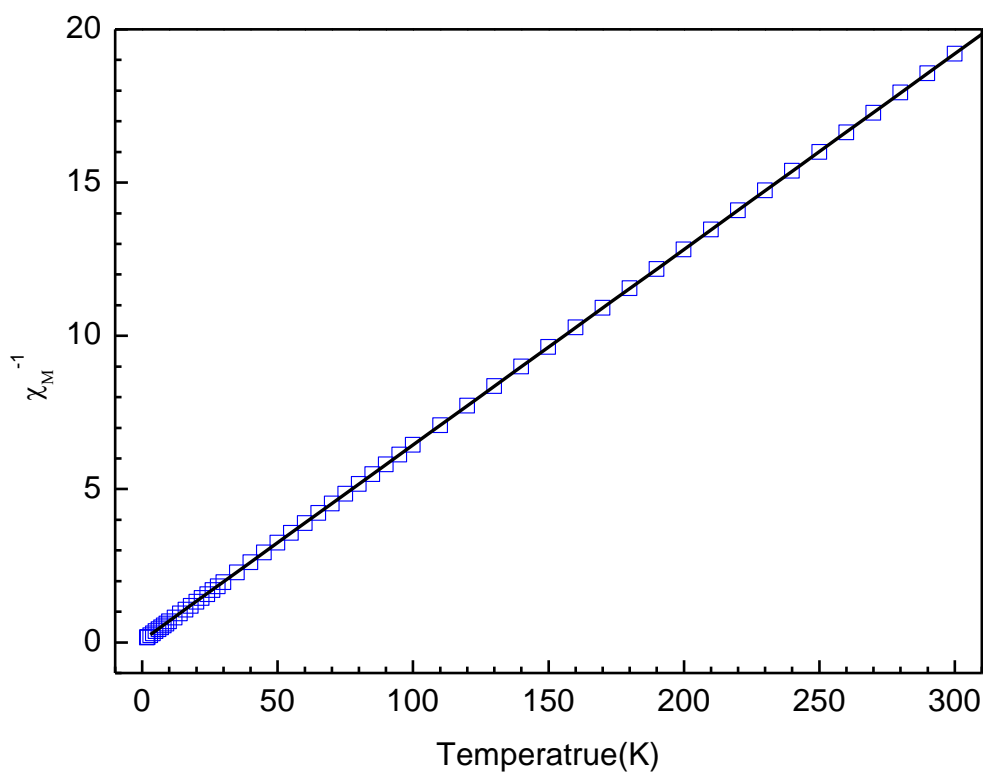

**Fig. S5.** Plots of  $\chi_M^{-1}$  vs.  $T$  for **1·Gd**. The solid line is estimated from the Curie–Weiss law.

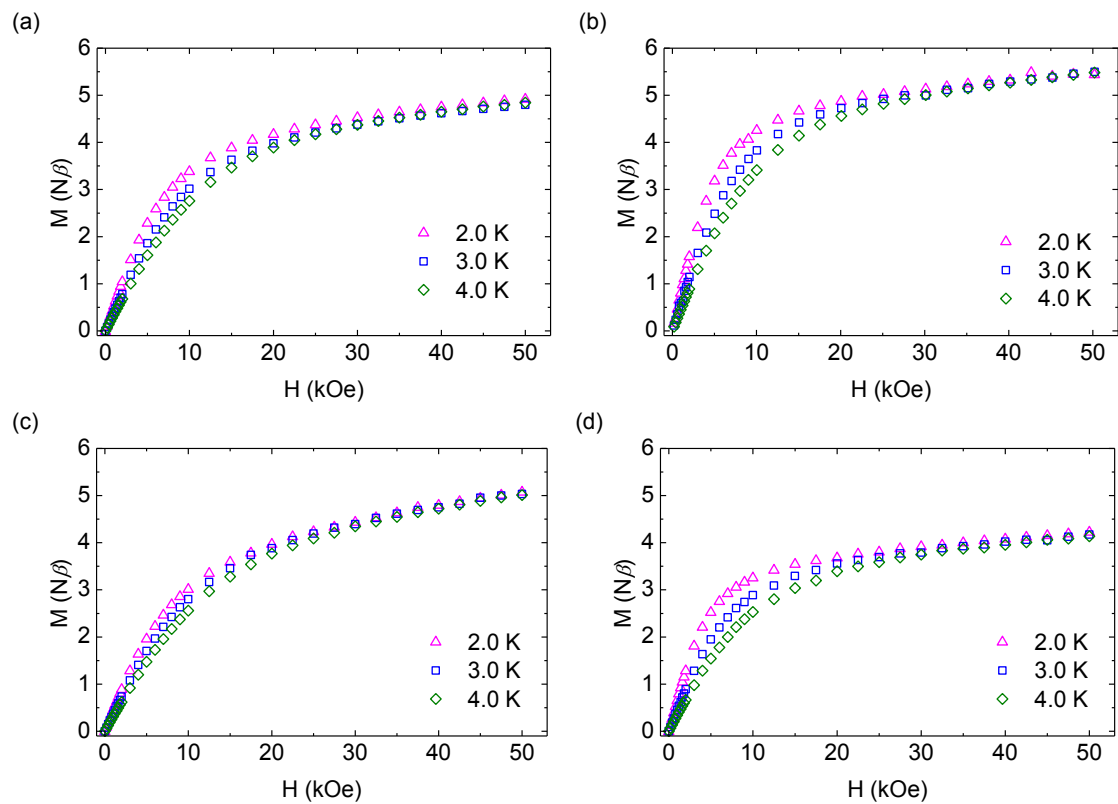

**Fig. S4.** Magnetization vs. applied field plots at 2.0, 3.0, 4.0 K of (a)  $1\cdot\text{Tb}$ , (b)  $1\cdot\text{Dy}$  (c)  $1\cdot\text{Ho}$  and (d)  $1\cdot\text{Er}$ .

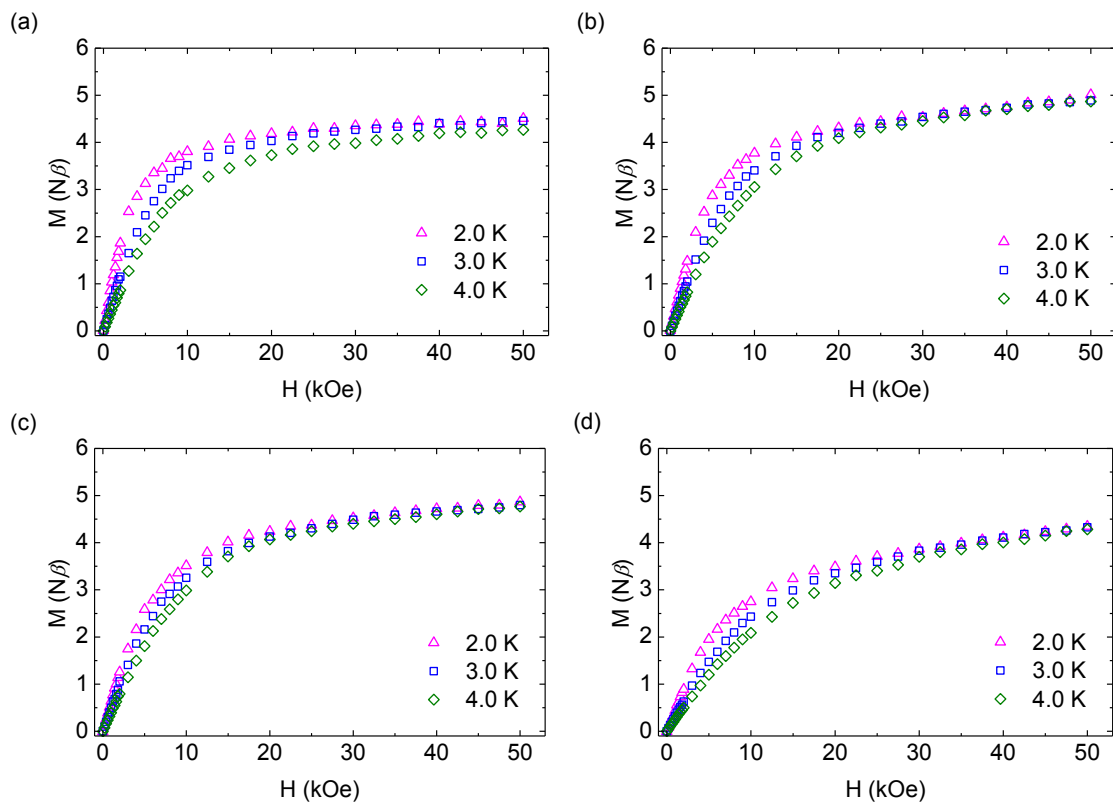

**Fig. S5.** Magnetization vs. applied field plots at 2.0, 3.0, 4.0 K of (a)  $2\cdot\text{Tb}$ , (b)  $2\cdot\text{Dy}$  (c)  $2\cdot\text{Ho}$  and (d)  $2\cdot\text{Er}$ .

(a)

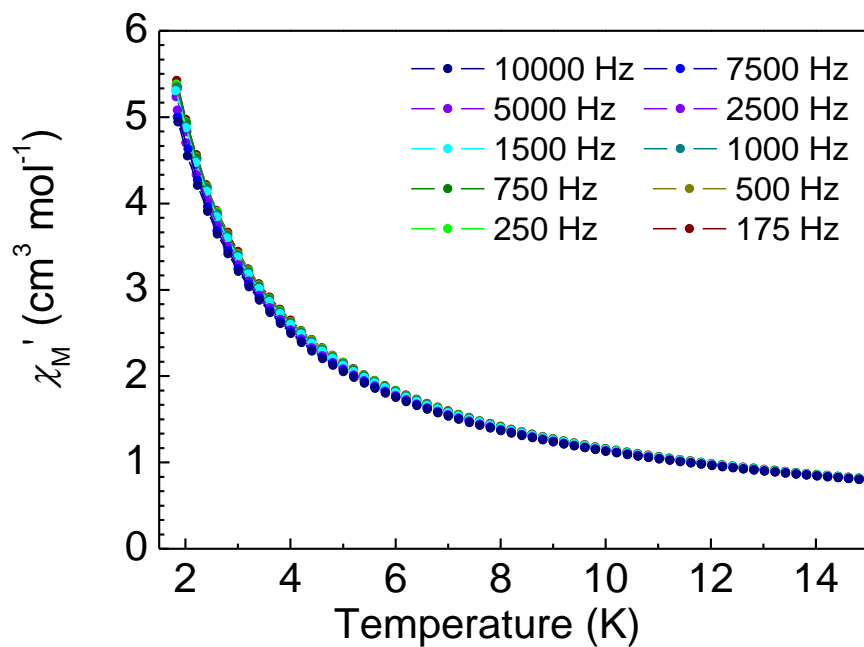

(b)

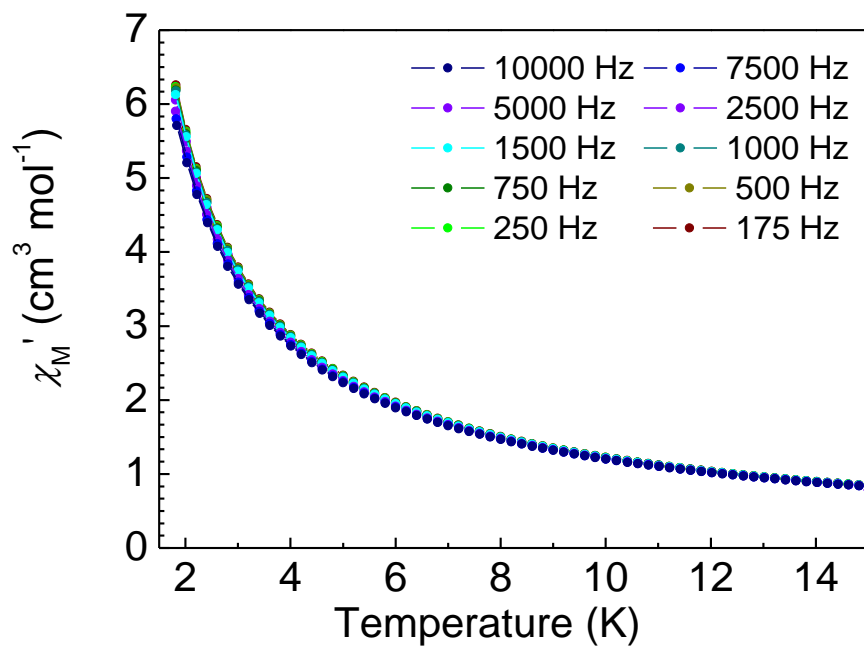

**Fig. S6.** Plots of  $\chi_M'$  vs. temperature for a powder samples of (a)  $1 \cdot \text{Dr}$  and (b)  $2 \cdot \text{Dy}$  in a 3.5 G ac field. The data were collected in an ac field oscillating at the indicated frequency.

(a)

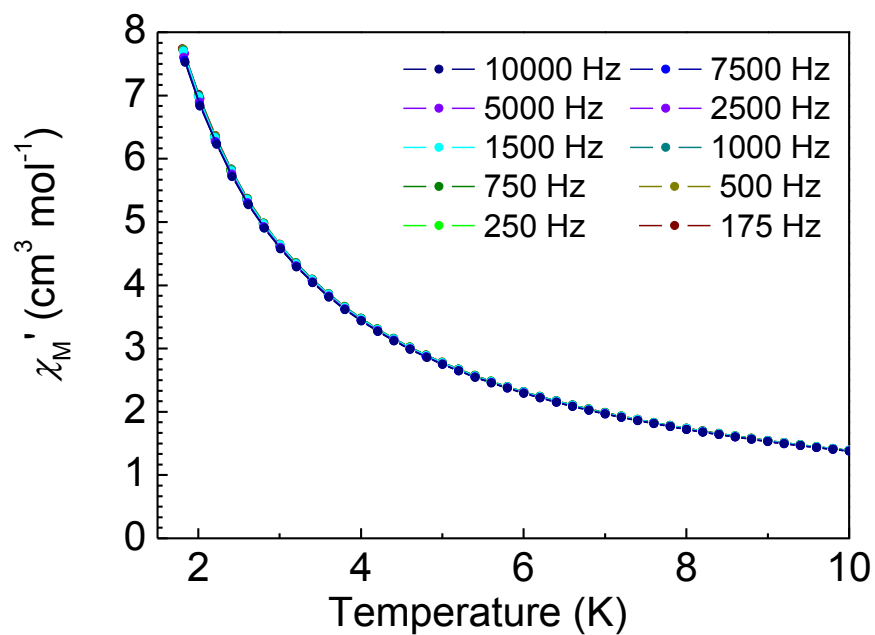

(b)

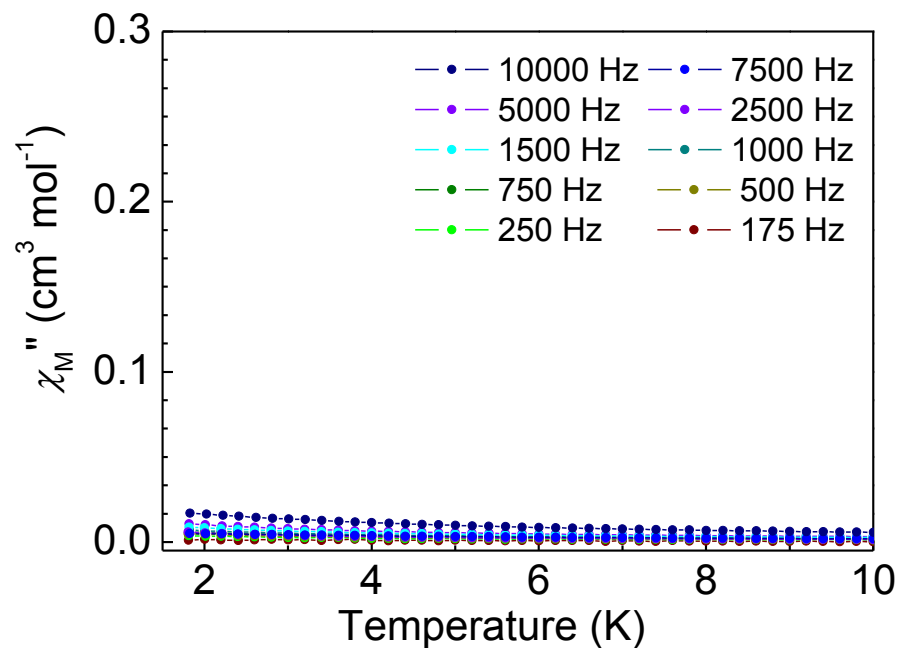

**Fig. S7.** Plots of (a)  $\chi_M'$  vs. temperature and (a)  $\chi_M''$  vs. temperature for a powder samples of  $1 \cdot \text{Gd}$  in a 3.5 G ac field. The data were collected in an ac field oscillating at the indicated frequency.

(a)

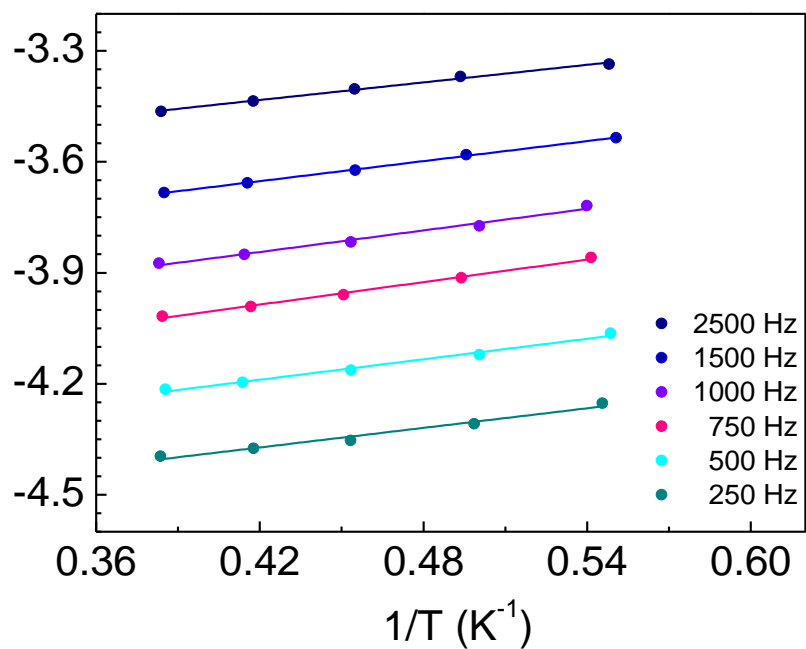

(b)

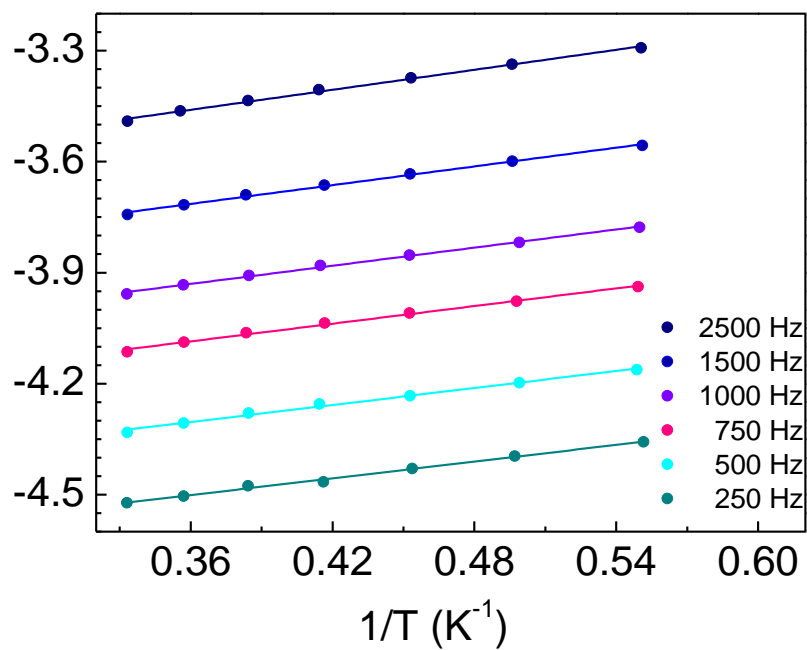

**Fig. S8.** Plots of natural logarithm of  $\chi''/\chi'$  vs  $T^{-1}$  (a)  $1 \cdot \text{Dr}$  and (b)  $2 \cdot \text{Dy}$ ; the solid line represents the fitting in the range of 1.8–3.2 K
